# Supplementary material for: Sex Differences in the Association of Sibship Size and Position in Sibship with Lipid Profile during Adolescence: A Cross-Sectional Study
Source: Hindawi journal article supplement (doi:10.1155/2022/8727922), 2022-09-27
Supplement: f1 [file 8727922.f1.pdf]

**Table S1.** Associations of total number of siblings, number of older siblings, and number of younger siblings with frequency of vigorous physical activity per week stratified by sex

| Vigorous physical activity per week | Total siblings |               |                |                |       | Older siblings |                |                |                |       | Younger siblings |                |                |                |       |
|-------------------------------------|----------------|---------------|----------------|----------------|-------|----------------|----------------|----------------|----------------|-------|------------------|----------------|----------------|----------------|-------|
|                                     | 0 & 1          | 2             | 3              | ≥4             | P*    | 0              | 1              | 2              | ≥3             | P*    | 0                | 1              | 2              | ≥3             | P*    |
| <b>Boys</b>                         | <b>(n=21)</b>  | <b>(n=52)</b> | <b>(n=118)</b> | <b>(n=524)</b> |       | <b>(n=187)</b> | <b>(n=144)</b> | <b>(n=139)</b> | <b>(n=275)</b> |       | <b>(n=55)</b>    | <b>(n=118)</b> | <b>(n=143)</b> | <b>(n=396)</b> |       |
| <b>Never/occasionally</b>           | 23.8 (5)       | 15.4 (8)      | 20.3 (24)      | 28.4 (149)     | 0.336 | 26.7 (50)      | 21.5 (31)      | 23.0 (32)      | 28.4 (78)      | 0.397 | 23.6 (13)        | 22.0 (26)      | 24.5 (35)      | 28.0 (111)     | 0.949 |
| <b>Once or twice</b>                | 42.9 (9)       | 53.9 (28)     | 50.0 (59)      | 44.9 (235)     |       | 44.4 (83)      | 52.8 (76)      | 46.0 (64)      | 45.5 (125)     |       | 45.5 (25)        | 50.0 (59)      | 47.6 (68)      | 44.7 (177)     |       |
| <b>Three or four times</b>          | 19.1 (4)       | 23.1 (12)     | 15.3 (18)      | 14.3 (75)      |       | 19.3 (36)      | 12.5 (18)      | 15.1 (21)      | 13.5 (37)      |       | 14.6 (8)         | 14.4 (17)      | 15.4 (22)      | 15.7 (62)      |       |
| <b>Five or more times</b>           | 14.3 (3)       | 7.7 (4)       | 14.4 (17)      | 12.4 (65)      |       | 9.6 (18)       | 13.2 (19)      | 15.8 (22)      | 12.7 (35)      |       | 16.4 (9)         | 13.6 (16)      | 12.6 (18)      | 11.6 (46)      |       |
| <b>Girls</b>                        | <b>(n=22)</b>  | <b>(n=44)</b> | <b>(n=98)</b>  | <b>(n=643)</b> |       | <b>(n=193)</b> | <b>(n=158)</b> | <b>(n=153)</b> | <b>(n=315)</b> |       | <b>(n=58)</b>    | <b>(n=145)</b> | <b>(n=137)</b> | <b>(n=461)</b> |       |
| <b>Never/occasionally</b>           | 31.8 (7)       | 34.1 (15)     | 38.8 (38)      | 37.3 (240)     | 0.544 | 36.4 (70)      | 36.7 (58)      | 39.2 (60)      | 37.1 (117)     | 0.754 | 31.0 (18)        | 36.6 (53)      | 38.0 (52)      | 38.0 (175)     | 0.279 |
| <b>Once or twice</b>                | 50.0 (11)      | 36.4 (16)     | 50.0 (49)      | 49.1 (316)     |       | 52.3 (101)     | 48.1 (76)      | 47.7 (73)      | 47.0 (148)     |       | 55.2 (32)        | 42.8 (62)      | 48.2 (66)      | 49.9 (230)     |       |
| <b>Three or four times</b>          | 18.2 (4)       | 13.6 (6)      | 9.2 (9)        | 8.9 (57)       |       | 8.3 (16)       | 10.1 (16)      | 10.5 (16)      | 9.5 (30)       |       | 6.9 (4)          | 12.4 (18)      | 8.8 (12)       | 8.9 (41)       |       |
| <b>Five or more times</b>           | (0)            | 15.9 (9)      | 2.0 (2)        | 4.7 (30)       |       | 3.1 (6)        | 5.1 (8)        | 2.6 (8)        | 6.4 (20)       |       | 6.9 (4)          | 8.3 (12)       | 5.1 (7)        | 3.3 (15)       |       |

Figures are presented as % (n).

\* P-values were estimated using fisher's exact tests.
